# Supplementary material for: Comparative Analysis of Six Correlation Metrics on Identifying DNA Co-Methylation Patterns
Source: Research Square preprint supplement (doi:10.21203/rs.3.rs-5883112/v1), 2025-04-22
Supplement: Supplementary file 1 [file c1b924330c195a163b83ec66.pdf]

**Supplemental file for the manuscript:**

# **Comparative Analysis of Six Correlation Metrics on Identifying DNA Co-Methylation Patterns**

**Mayla Ward, Neo Eloff, and Shuying Sun**

<sup>a</sup>Department of Mathematics, Western Washington University, 516 High St, Bellingham, WA, USA, 98225.  
Email: [maylacward@gmail.com](mailto:maylacward@gmail.com)

<sup>b</sup>Department of Mathematics, Texas State University, 601 University Dr., San Marcos, TX, USA, 78666.  
Email: [neoeloff@gmail.com](mailto:neoeloff@gmail.com)

<sup>b</sup>Department of Mathematics, Texas State University, 601 University Dr., San Marcos, TX, USA, 78666.  
Email: [ssun@txstate.edu](mailto:ssun@txstate.edu)

**\*Corresponding author:** Shuying Sun. Email: [ssun@txstate.edu](mailto:ssun@txstate.edu) or [ssun5211@yahoo.com](mailto:ssun5211@yahoo.com)

ORCID ID of Shuying Sun: 0000-0003-3974-6996

## **Supplemental 8x8 tables**

Table S1 includes a few 8x8 matrices comparing correlation scores computed for pairs using different sample sizes (10, 30, and 53). Pink cells have counts comprising 20%-40% of the row total. Blue cells have counts comprising 40%-70% of the row total. Green cells have counts comprising 70%-100% of the row totals.

The 8x8 matrices in Table S1 show a much stronger agreement (indicated by stronger diagonals) between the 30N and 53N sample correlations as opposed to the comparisons with the 10 sample correlations. This stronger diagonal is evident when comparing sample sizes for every metric and data type. Specifically, for all 30N x 53N 8x8 tables, at least 80% of the correlations generated with 30 samples fell within the corresponding diagonal cell of the 53N 8x8 table or one cell to the right or left. This indicated that most CG pairs consistently received similar correlation scores using 30 samples as compared to 53 samples. This strong agreement was not present when comparing 10N and 30N correlation scores, or when comparing 10N and 53N correlation scores. In general, there appeared to be a strong tendency for higher sample sizes (30N and 53N) to assign lower scores to many of the pairs that have high correlations scores when only 10 samples are provided. As a result, the 8x8 tables for 30N and 53N samples show a higher concentration of scores in the most crowded intervals for each metric ( $[-0.25, 0]$  and  $[0, 0.25]$  for Pearson, Spearman, and Kendall correlations;  $[0, 0.25]$  for Hoeffding;  $[0.25, 0.5]$  for Distance and MIC correlations).

Table S1: 8x8 matrices comparing correlation scores with different sample sizes

A. B.Pearson

| B.Pearson.10kx10k.30N [-1,-0.75]*10k.30N [-0.75,-0.5]*10k.30N [-0.5,-0.25]*kx10k.30N [-0.25,0]*kx10k.30N [0.0,0.25]*x10k.30N [0.25,0.5]*x10k.30N [0.5,0.75]*kx10k.30N [0.75,1] |         |       |         |        |         |         |         |         |         |         |         |         |         |         |         |        | Total Count |
|--------------------------------------------------------------------------------------------------------------------------------------------------------------------------------|---------|-------|---------|--------|---------|---------|---------|---------|---------|---------|---------|---------|---------|---------|---------|--------|-------------|
| B.pearson.10kx10k.10N [-1,-0.75]                                                                                                                                               | 6.4%    | 4761  | 21.075% | 157261 | 24.157% | 180255  | 21.569% | 160947  | 15.746% | 117496  | 7.891%  | 58885   | 2.525%  | 18844   | 0.632%  | 4718   | 746167      |
| B.pearson.10kx10k.10N [-0.75,-0.5]                                                                                                                                             | 0.946%  | 36985 | 8.814%  | 344396 | 19.913% | 778103  | 25.635% | 1001662 | 23.407% | 914601  | 14.287% | 558259  | 5.441%  | 212602  | 1.554%  | 60741  | 3907349     |
| B.pearson.10kx10k.10N [-0.5,-0.25]                                                                                                                                             | 0.444%  | 36585 | 4.619%  | 380619 | 15.011% | 1236852 | 24.679% | 2033482 | 26.21%  | 2159653 | 18.511% | 1525292 | 8.034%  | 662055  | 2.489%  | 205148 | 8239686     |
| B.pearson.10kx10k.10N [-0.25,0]                                                                                                                                                | 0.359%  | 40831 | 3.107%  | 353173 | 11.342% | 1289317 | 22.184% | 2521711 | 17.349% | 3108847 | 21.914% | 2490997 | 10.397% | 1181892 | 3.344%  | 380212 | 11369800    |
| B.pearson.10kx10k.10N [0.0,0.25]                                                                                                                                               | 0.315%  | 36543 | 2.317%  | 268808 | 8.702%  | 1009525 | 18.964% | 2200044 | 27.36%  | 3173966 | 25.23%  | 2926931 | 13.011% | 1509456 | 4.097%  | 475331 | 11606064    |
| B.pearson.10kx10k.10N [0.25,0.5]                                                                                                                                               | 0.255%  | 22373 | 1.673%  | 146713 | 6.427%  | 563349  | 15.367% | 1346943 | 25.63%  | 2246516 | 28.448% | 2493488 | 17.195% | 1507169 | 5.003%  | 438518 | 8765069     |
| B.pearson.10kx10k.10N [0.5,0.75]                                                                                                                                               | 0.172%  | 7638  | 1.059%  | 46853  | 4.124%  | 182480  | 10.928% | 483504  | 21.184% | 937214  | 29.761% | 1316691 | 25.365% | 1122170 | 7.403%  | 327529 | 4420479     |
| B.pearson.10kx10k.10N [0.75,1]                                                                                                                                                 | 0.064%  | 611   | 0.441%  | 4169   | 1.784%  | 16683   | 5.374%  | 50788   | 12.512% | 118252  | 23.334% | 220523  | 35.579% | 336248  | 20.909% | 197612 | 945066      |
|                                                                                                                                                                                |         |       |         |        |         |         |         |         |         |         |         |         |         |         |         |        |             |
| B.Pearson.10kx10k.53N [-1,-0.75]*10k.53N [-0.75,-0.5]*10k.53N [-0.5,-0.25]*kx10k.53N [-0.25,0]*kx10k.53N [0.0,0.25]*x10k.53N [0.25,0.5]*x10k.53N [0.5,0.75]*kx10k.53N [0.75,1] |         |       |         |        |         |         |         |         |         |         |         |         |         |         |         |        | Total Count |
| B.pearson.10kx10k.10N [-1,-0.75]                                                                                                                                               | 6.08%   | 45367 | 22.39%  | 167074 | 24.202% | 180589  | 23.544% | 175684  | 16.236% | 121155  | 5.981%  | 44633   | 1.308%  | 9767    | 0.254%  | 1898   | 746167      |
| B.pearson.10kx10k.10N [-0.75,-0.5]                                                                                                                                             | 0.511%  | 19985 | 7.169%  | 280119 | 19.644% | 767590  | 30.614% | 1196220 | 26.675% | 1042320 | 11.71%  | 457556  | 2.998%  | 117148  | 0.675%  | 26411  | 3907349     |
| B.pearson.10kx10k.10N [-0.5,-0.25]                                                                                                                                             | 0.152%  | 12564 | 2.874%  | 236884 | 13.821% | 1138849 | 29.751% | 2451421 | 31.505% | 2595928 | 16.126% | 1328789 | 4.657%  | 383748  | 1.11%   | 91503  | 8239686     |
| B.pearson.10kx10k.10N [-0.25,0]                                                                                                                                                | 0.119%  | 13626 | 1.745%  | 198376 | 10.248% | 1164898 | 26.532% | 3015911 | 33.671% | 3827427 | 19.937% | 2266324 | 6.214%  | 706444  | 1.53%   | 173974 | 11369800    |
| B.pearson.10kx10k.10N [0.0,0.25]                                                                                                                                               | 0.104%  | 12078 | 1.294%  | 150124 | 7.925%  | 919409  | 22.877% | 2653982 | 34.059% | 3951140 | 23.806% | 2741660 | 8.037%  | 932426  | 1.894%  | 219785 | 11606064    |
| B.pearson.10kx10k.10N [0.25,0.5]                                                                                                                                               | 0.083%  | 7309  | 0.937%  | 82197  | 5.92%   | 518957  | 18.624% | 1632432 | 32.385% | 2838634 | 28.236% | 2474960 | 11.478% | 1006138 | 2.332%  | 204442 | 8765069     |
| B.pearson.10kx10k.10N [0.5,0.75]                                                                                                                                               | 0.054%  | 2419  | 0.582%  | 25757  | 3.747%  | 165801  | 13.199% | 583959  | 26.834% | 1187161 | 31.6%   | 1398011 | 20.072% | 888002  | 3.909%  | 172969 | 4420479     |
| B.pearson.10kx10k.10N [0.75,1]                                                                                                                                                 | 0.023%  | 219   | 0.219%  | 2070   | 1.578%  | 14920   | 6.56%   | 60077   | 15.519% | 146669  | 25.598% | 241918  | 33.845% | 319859  | 16.859% | 159334 | 945066      |
|                                                                                                                                                                                |         |       |         |        |         |         |         |         |         |         |         |         |         |         |         |        |             |
| B.Pearson.10kx10k.53N [-1,-0.75]*10k.53N [-0.75,-0.5]*10k.53N [-0.5,-0.25]*kx10k.53N [-0.25,0]*kx10k.53N [0.0,0.25]*x10k.53N [0.25,0.5]*x10k.53N [0.5,0.75]*kx10k.53N [0.75,1] |         |       |         |        |         |         |         |         |         |         |         |         |         |         |         |        | Total Count |
| B.pearson.10kx10k.30N [-1,-0.75]                                                                                                                                               | 39.459% | 90492 | 51.964% | 119169 | 7.757%  | 17791   | 0.78%   | 1790    | 0.035%  | 81      | 0.001%  | 4       | 0%      | 0       | 0%      | 0      | 229327      |
| B.pearson.10kx10k.30N [-0.75,-0.5]                                                                                                                                             | 1.174%  | 19991 | 45.186% | 769078 | 46.491% | 791279  | 6.575%  | 111920  | 0.516%  | 8792    | 0.05%   | 863     | 0.003%  | 68      | 0%      | 1      | 1701992     |
| B.pearson.10kx10k.30N [-0.5,-0.25]                                                                                                                                             | 0.033%  | 1746  | 4.175%  | 219488 | 55.23%  | 2903346 | 37.047% | 1947515 | 3.263%  | 171542  | 0.223%  | 11724   | 0.024%  | 1296    | 0.001%  | 87     | 5256744     |
| B.pearson.10kx10k.30N [-0.25,0]                                                                                                                                                | 0.009%  | 920   | 0.257%  | 25197  | 10.634% | 1042123 | 65.116% | 6380824 | 22.986% | 2252473 | 0.908%  | 89008   | 0.082%  | 8083    | 0.004%  | 453    | 9799081     |
| B.pearson.10kx10k.30N [0.0,0.25]                                                                                                                                               | 0.002%  | 358   | 0.063%  | 8097   | 0.787%  | 100562  | 23.752% | 3034696 | 65.214% | 8332154 | 9.93%   | 1268824 | 0.239%  | 30613   | 0.009%  | 1241   | 12776545    |
| B.pearson.10kx10k.30N [0.25,0.5]                                                                                                                                               | 0%      | 57    | 0.012%  | 1479   | 0.129%  | 10502   | 2.385%  | 276521  | 39.865% | 4620876 | 54.235% | 6286522 | 3.342%  | 387455  | 0.027%  | 3154   | 11591066    |
| B.pearson.10kx10k.30N [0.5,0.75]                                                                                                                                               | 0%      | 3     | 0.001%  | 92     | 0.013%  | 906     | 0.243%  | 15963   | 4.803%  | 314629  | 49.295% | 3229909 | 44.795% | 2934329 | 0.846%  | 55424  | 6550436     |
| B.pearson.10kx10k.30N [0.75,1]                                                                                                                                                 | 0%      | 0     | 0%      | 1      | 0%      | 4       | 0.021%  | 457     | 0.473%  | 9887    | 4.202%  | 87816   | 47.932% | 1001688 | 47.37%  | 989956 | 2089809     |

B. Spearman

| Spearman.10kx10k.30N [-1,-0.75]*k.30k.30N [-0.75,-0.5]*k.30k.30N [-0.5,-0.25]*kx10k.30N [-0.25,0]*kx10k.30N [0.0,0.25]*x10k.30N [0.25,0.5]*x10k.30N [0.5,0.75]*kx10k.30N [0.75,1] |         |       |         |        |         |         |         |         |         |         |         |         |         |         |         |        | Total Count |
|-----------------------------------------------------------------------------------------------------------------------------------------------------------------------------------|---------|-------|---------|--------|---------|---------|---------|---------|---------|---------|---------|---------|---------|---------|---------|--------|-------------|
| Spearman.10kx10k.10N [-1,-0.75]                                                                                                                                                   | 7.452%  | 56832 | 22.348% | 170424 | 26.049% | 198647  | 24.052% | 183418  | 14.734% | 112359  | 4.839%  | 36902   | 0.519%  | 3958    | 0.003%  | 28     | 762568      |
| Spearman.10kx10k.10N [-0.75,-0.5]                                                                                                                                                 | 0.965%  | 36392 | 9.806%  | 369436 | 22.114% | 833128  | 29.718% | 1119605 | 25.345% | 954865  | 10.661% | 401059  | 1.374%  | 51801   | 0.012%  | 474    | 3767360     |
| Spearman.10kx10k.10N [-0.5,-0.25]                                                                                                                                                 | 0.192%  | 14973 | 4.668%  | 363417 | 16.823% | 1309536 | 28.458% | 2251242 | 30.6%   | 2381932 | 16.545% | 1287886 | 2.676%  | 208364  | 0.034%  | 2690   | 7784040     |
| Spearman.10kx10k.10N [-0.25,0]                                                                                                                                                    | 0.064%  | 7712  | 2.44%   | 291257 | 12.308% | 1468930 | 25.081% | 2993235 | 32.481% | 3876390 | 22.723% | 2711901 | 4.81%   | 574036  | 0.089%  | 10710  | 11934171    |
| Spearman.10kx10k.10N [0.0,0.25]                                                                                                                                                   | 0.025%  | 3077  | 1.306%  | 159475 | 8.563%  | 1045101 | 20.821% | 2541016 | 31.774% | 3877691 | 28.764% | 3510313 | 8.507%  | 1038293 | 0.235%  | 28771  | 12203737    |
| Spearman.10kx10k.10N [0.25,0.5]                                                                                                                                                   | 0.009%  | 812   | 0.699%  | 58488  | 5.584%  | 466619  | 16.12%  | 1349698 | 28.82%  | 2408133 | 33.422% | 2792632 | 14.617% | 1221336 | 0.725%  | 60951  | 8355579     |
| Spearman.10kx10k.10N [0.5,0.75]                                                                                                                                                   | 0.003%  | 150   | 0.35%   | 14965  | 3.246%  | 138801  | 10.976% | 469282  | 23.267% | 994761  | 34.456% | 1473107 | 24.497% | 1047351 | 3.201%  | 136666 | 4275283     |
| Spearman.10kx10k.10N [0.75,1]                                                                                                                                                     | 0%      | 9     | 0.13%   | 1186   | 1.351%  | 12333   | 5.317%  | 48505   | 13.805% | 125941  | 27.044% | 246719  | 35.113% | 320328  | 17.236% | 15724  | 912262      |
|                                                                                                                                                                                   |         |       |         |        |         |         |         |         |         |         |         |         |         |         |         |        |             |
| Spearman.10kx10k.53N [-1,-0.75]*k.53N [-0.75,-0.5]*k.53N [-0.5,-0.25]*kx10k.53N [-0.25,0]*kx10k.53N [0.0,0.25]*x10k.53N [0.25,0.5]*x10k.53N [0.5,0.75]*kx10k.53N [0.75,1]         |         |       |         |        |         |         |         |         |         |         |         |         |         |         |         |        | Total Count |
| Spearman.10kx10k.10N [-1,-0.75]                                                                                                                                                   | 4.464%  | 34044 | 23.409% | 178510 | 26.411% | 201404  | 25.107% | 191461  | 15.294% | 116634  | 4.75%   | 36222   | 0.552%  | 4214    | 0.01%   | 79     | 762568      |
| Spearman.10kx10k.10N [-0.75,-0.5]                                                                                                                                                 | 0.389%  | 14673 | 7.761%  | 292421 | 21.63%  | 814901  | 33.083% | 1246390 | 26.707% | 1006165 | 9.287%  | 349883  | 1.117%  | 42089   | 0.022%  | 838    | 3767360     |
| Spearman.10kx10k.10N [-0.5,-0.25]                                                                                                                                                 | 0.071%  | 5577  | 3.162%  | 246164 | 15.745% | 1225634 | 32.557% | 2354263 | 33.175% | 2582390 | 13.533% | 1053484 | 1.713%  | 133375  | 0.04%   | 3153   | 7784040     |
| Spearman.10kx10k.10N [-0.25,0]                                                                                                                                                    | 0.03%   | 3677  | 1.693%  | 202084 | 11.624% | 1387276 | 29.215% | 3486610 | 36.522% | 4358615 | 18.249% | 2177923 | 2.6%    | 310299  | 0.063%  | 7634   | 11934171    |
| Spearman.10kx10k.10N [0.0,0.25]                                                                                                                                                   | 0.018%  | 2239  | 1.051%  | 128308 | 8.501%  | 1037561 | 24.801% | 3026688 | 37.417% | 4566378 | 23.802% | 2904789 | 4.287%  | 523248  | 0.119%  | 14526  | 12203737    |
| Spearman.10kx10k.10N [0.25,0.5]                                                                                                                                                   | 0.011%  | 978   | 0.703%  | 58795  | 6.044%  | 505071  | 19.788% | 1653421 | 35.693% | 2982387 | 29.62%  | 274967  | 7.801%  | 651823  | 0.336%  | 28137  | 8355579     |
| Spearman.10kx10k.10N [0.5,0.75]                                                                                                                                                   | 0.007%  | 333   | 0.44%   | 18837  | 3.922%  | 167701  | 14.11%  | 603245  | 30.029% | 1283827 | 33.827% | 1446224 | 15.914% | 680381  | 1.748%  | 74735  | 4275283     |
| Spearman.10kx10k.10N [0.75,1]                                                                                                                                                     | 0.003%  | 30    | 0.21%   | 1923   | 1.869%  | 17055   | 7.243%  | 66083   | 18.416% | 168009  | 29.424% | 268430  | 30.329% | 276680  | 12.502% | 114052 | 912262      |
|                                                                                                                                                                                   |         |       |         |        |         |         |         |         |         |         |         |         |         |         |         |        |             |
| Spearman.10kx10k.53N [-1,-0.75]*k.53N [-0.75,-0.5]*k.53N [-0.5,-0.25]*kx10k.53N [-0.25,0]*kx10k.53N [0.0,0.25]*x10k.53N [0.25,0.5]*x10k.53N [0.5,0.75]*kx10k.53N [0.75,1]         |         |       |         |        |         |         |         |         |         |         |         |         |         |         |         |        | Total Count |
| Spearman.10kx10k.30N [-1,-0.75]                                                                                                                                                   | 36.237% | 43470 | 61.099% | 73293  | 2.632%  | 3158    | 0.029%  | 35      | 0%      | 1       | 0%      | 0       | 0%      | 0       | 0%      | 0      | 119957      |
| Spearman.10kx10k.30N [-0.75,-0.5]                                                                                                                                                 | 1.243%  | 17761 | 48.85%  | 697897 | 46.187% | 659858  | 3.695%  | 52800   | 0.023%  | 330     | 0%      | 2       | 0%      | 0       | 0%      | 1      | 1428648     |
| Spearman.10kx10k.30N [-0.5,-0.25]                                                                                                                                                 | 0.005%  | 320   | 6.287%  | 344110 | 56.017% | 3065906 | 36.039% | 1972449 | 1.647%  | 90155   | 0.002%  | 155     | 0%      | 0       | 0%      | 0      | 5473095     |
| Spearman.10kx10k.30N [-0.25,0]                                                                                                                                                    | 0%      | 0     | 0.107%  | 11706  | 14.164% | 1546378 | 62.063% | 3776634 | 23.127% | 2524938 | 0.536%  | 58598   | 0%      | 17      | 0%      | 0      | 10912721    |
| Spearman.10kx10k.30N [0.0,0.25]                                                                                                                                                   | 0%      | 0     | 0.36%   | 0      | 0.548%  | 80764   | 25.778% | 375711  | 61.665% | 908458  | 12.709% | 178397  | 4.097%  | 14293   | 0%      | 0      | 14732072    |
| Spearman.10kx10k.30N [0.25,0.5]                                                                                                                                                   | 0%      | 0     | 0%      | 0      | 0.004%  | 541     | 1.907%  | 237711  | 41.232% | 513947  | 52.102% | 6492547 | 4.738%  | 590487  | 0.003%  | 397    | 44611159    |
| Spearman.10kx10k.30N [0.5,0.75]                                                                                                                                                   | 0%      | 0     | 0%      | 0      | 0%      | 0       | 0.026%  | 1171    | 5.033%  | 224776  | 52.823% | 2358823 | 40.612% | 1813355 | 1.504%  | 67162  | 4465467     |
| Spearman.10kx10k.30N [0.75,1]                                                                                                                                                     | 0%      | 0     | 0%      | 0      | 0%      | 0       | 0%      | 0       | 0.046%  | 185     | 4.485%  | 17823   | 51.279% | 203768  | 44.189% | 175595 | 397371      |

C. Kendall

||
||
||

## E. B.Distance

| B.Distance.10kx10k.30N [-1,-0.75]*10k.30N [-0.75,-0.5]*10k.30N [-0.5,-0.25]*kx10k.30N [-0.25,0]*kx10k.30N [0.0,0.25]*x10k.30N [0.25,0.5]*x10k.30N [0.5,0.75]*kx10k.30N [0.75,1] | Total Count |
|---------------------------------------------------------------------------------------------------------------------------------------------------------------------------------|-------------|
| B.distance.10kx10k.10N [-1,-0.75]                                                                                                                                               | 0           |
| B.distance.10kx10k.10N [-0.75,-0.5]                                                                                                                                             | 0           |
| B.distance.10kx10k.10N [-0.5,-0.25]                                                                                                                                             | 0           |
| B.distance.10kx10k.10N [-0.25,0]                                                                                                                                                | 0           |
| B.distance.10kx10k.10N [0.0,0.25]                                                                                                                                               | 7789        |
| B.distance.10kx10k.10N [0.25,0.5]                                                                                                                                               | 25302940    |
| B.distance.10kx10k.10N [0.5,0.75]                                                                                                                                               | 22099132    |
| B.distance.10kx10k.10N [0.75,1]                                                                                                                                                 | 2585139     |
| B.Distance.10kx10k.53N [-1,-0.75]*10k.53N [-0.75,-0.5]*10k.53N [-0.5,-0.25]*kx10k.53N [-0.25,0]*kx10k.53N [0.0,0.25]*x10k.53N [0.25,0.5]*x10k.53N [0.5,0.75]*kx10k.53N [0.75,1] |             |
| B.distance.10kx10k.10N [-1,-0.75]                                                                                                                                               | 0           |
| B.distance.10kx10k.10N [-0.75,-0.5]                                                                                                                                             | 0           |
| B.distance.10kx10k.10N [-0.5,-0.25]                                                                                                                                             | 0           |
| B.distance.10kx10k.10N [-0.25,0]                                                                                                                                                | 0           |
| B.distance.10kx10k.10N [0.0,0.25]                                                                                                                                               | 7789        |
| B.distance.10kx10k.10N [0.25,0.5]                                                                                                                                               | 25302940    |
| B.distance.10kx10k.10N [0.5,0.75]                                                                                                                                               | 22099132    |
| B.distance.10kx10k.10N [0.75,1]                                                                                                                                                 | 2585139     |
| B.Distance.10kx10k.53N [-1,-0.75]*10k.53N [-0.75,-0.5]*10k.53N [-0.5,-0.25]*kx10k.53N [-0.25,0]*kx10k.53N [0.0,0.25]*x10k.53N [0.25,0.5]*x10k.53N [0.5,0.75]*kx10k.53N [0.75,1] |             |
| B.distance.10kx10k.10N [-1,-0.75]                                                                                                                                               | 0           |
| B.distance.10kx10k.10N [-0.75,-0.5]                                                                                                                                             | 0           |
| B.distance.10kx10k.10N [-0.5,-0.25]                                                                                                                                             | 0           |
| B.distance.10kx10k.10N [-0.25,0]                                                                                                                                                | 0           |
| B.distance.10kx10k.10N [0.0,0.25]                                                                                                                                               | 7789        |
| B.distance.10kx10k.10N [0.25,0.5]                                                                                                                                               | 25302940    |
| B.distance.10kx10k.10N [0.5,0.75]                                                                                                                                               | 22099132    |
| B.distance.10kx10k.10N [0.75,1]                                                                                                                                                 | 2585139     |

## F. M.Distance

| M.Distance.10kx10k.30N [-1,-0.75]*10k.30N [-0.75,-0.5]*10k.30N [-0.5,-0.25]*kx10k.30N [-0.25,0]*kx10k.30N [0.0,0.25]*x10k.30N [0.25,0.5]*x10k.30N [0.5,0.75]*kx10k.30N [0.75,1] | Total Count |
|---------------------------------------------------------------------------------------------------------------------------------------------------------------------------------|-------------|
| M.distance.10kx10k.10N [-1,-0.75]                                                                                                                                               | 0           |
| M.distance.10kx10k.10N [-0.75,-0.5]                                                                                                                                             | 0           |
| M.distance.10kx10k.10N [-0.5,-0.25]                                                                                                                                             | 0           |
| M.distance.10kx10k.10N [-0.25,0]                                                                                                                                                | 0           |
| M.distance.10kx10k.10N [0.0,0.25]                                                                                                                                               | 4173        |
| M.distance.10kx10k.10N [0.25,0.5]                                                                                                                                               | 24608498    |
| M.distance.10kx10k.10N [0.5,0.75]                                                                                                                                               | 22825204    |
| M.distance.10kx10k.10N [0.75,1]                                                                                                                                                 | 2557125     |
| M.Distance.10kx10k.53N [-1,-0.75]*10k.53N [-0.75,-0.5]*10k.53N [-0.5,-0.25]*kx10k.53N [-0.25,0]*kx10k.53N [0.0,0.25]*x10k.53N [0.25,0.5]*x10k.53N [0.5,0.75]*kx10k.53N [0.75,1] |             |
| M.distance.10kx10k.10N [-1,-0.75]                                                                                                                                               | 0           |
| M.distance.10kx10k.10N [-0.75,-0.5]                                                                                                                                             | 0           |
| M.distance.10kx10k.10N [-0.5,-0.25]                                                                                                                                             | 0           |
| M.distance.10kx10k.10N [-0.25,0]                                                                                                                                                | 0           |
| M.distance.10kx10k.10N [0.0,0.25]                                                                                                                                               | 4173        |
| M.distance.10kx10k.10N [0.25,0.5]                                                                                                                                               | 24608498    |
| M.distance.10kx10k.10N [0.5,0.75]                                                                                                                                               | 22825204    |
| M.distance.10kx10k.10N [0.75,1]                                                                                                                                                 | 2557125     |
| M.Distance.10kx10k.53N [-1,-0.75]*10k.53N [-0.75,-0.5]*10k.53N [-0.5,-0.25]*kx10k.53N [-0.25,0]*kx10k.53N [0.0,0.25]*x10k.53N [0.25,0.5]*x10k.53N [0.5,0.75]*kx10k.53N [0.75,1] |             |
| M.distance.10kx10k.10N [-1,-0.75]                                                                                                                                               | 0           |
| M.distance.10kx10k.10N [-0.75,-0.5]                                                                                                                                             | 0           |
| M.distance.10kx10k.10N [-0.5,-0.25]                                                                                                                                             | 0           |
| M.distance.10kx10k.10N [-0.25,0]                                                                                                                                                | 0           |
| M.distance.10kx10k.10N [0.0,0.25]                                                                                                                                               | 4173        |
| M.distance.10kx10k.10N [0.25,0.5]                                                                                                                                               | 24608498    |
| M.distance.10kx10k.10N [0.5,0.75]                                                                                                                                               | 22825204    |
| M.distance.10kx10k.10N [0.75,1]                                                                                                                                                 | 2557125     |

## G. MIC

| MIC.10kx10k.30N [-1,-0.75]*10k.30N [-0.75,-0.5]*10k.30N [-0.5,-0.25]*kx10k.30N [-0.25,0]*kx10k.30N [0.0,0.25]*x10k.30N [0.25,0.5]*x10k.30N [0.5,0.75]*kx10k.30N [0.75,1] | Total Count |
|--------------------------------------------------------------------------------------------------------------------------------------------------------------------------|-------------|
| M.MIC.10kx10k.10N [-1,-0.75]                                                                                                                                             | 0           |
| M.MIC.10kx10k.10N [-0.75,-0.5]                                                                                                                                           | 0           |
| M.MIC.10kx10k.10N [-0.5,-0.25]                                                                                                                                           | 0           |
| M.MIC.10kx10k.10N [-0.25,0]                                                                                                                                              | 0           |
| M.MIC.10kx10k.10N [0.0,0.25]                                                                                                                                             | 24239589    |
| M.MIC.10kx10k.10N [0.25,0.5]                                                                                                                                             | 17934298    |
| M.MIC.10kx10k.10N [0.5,0.75]                                                                                                                                             | 7117834     |
| M.MIC.10kx10k.10N [0.75,1]                                                                                                                                               | 703279      |
| MIC.10kx10k.53N [-1,-0.75]*10k.53N [-0.75,-0.5]*10k.53N [-0.5,-0.25]*kx10k.53N [-0.25,0]*kx10k.53N [0.0,0.25]*x10k.53N [0.25,0.5]*x10k.53N [0.5,0.75]*kx10k.53N [0.75,1] |             |
| M.MIC.10kx10k.10N [-1,-0.75]                                                                                                                                             | 0           |
| M.MIC.10kx10k.10N [-0.75,-0.5]                                                                                                                                           | 0           |
| M.MIC.10kx10k.10N [-0.5,-0.25]                                                                                                                                           | 0           |
| M.MIC.10kx10k.10N [-0.25,0]                                                                                                                                              | 0           |
| M.MIC.10kx10k.10N [0.0,0.25]                                                                                                                                             | 24239589    |
| M.MIC.10kx10k.10N [0.25,0.5]                                                                                                                                             | 17934298    |
| M.MIC.10kx10k.10N [0.5,0.75]                                                                                                                                             | 7117834     |
| M.MIC.10kx10k.10N [0.75,1]                                                                                                                                               | 703279      |
| MIC.10kx10k.53N [-1,-0.75]*10k.53N [-0.75,-0.5]*10k.53N [-0.5,-0.25]*kx10k.53N [-0.25,0]*kx10k.53N [0.0,0.25]*x10k.53N [0.25,0.5]*x10k.53N [0.5,0.75]*kx10k.53N [0.75,1] |             |
| M.MIC.10kx10k.10N [-1,-0.75]                                                                                                                                             | 0           |
| M.MIC.10kx10k.10N [-0.75,-0.5]                                                                                                                                           | 0           |
| M.MIC.10kx10k.10N [-0.5,-0.25]                                                                                                                                           | 0           |
| M.MIC.10kx10k.10N [-0.25,0]                                                                                                                                              | 0           |
| M.MIC.10kx10k.10N [0.0,0.25]                                                                                                                                             | 24239589    |
| M.MIC.10kx10k.10N [0.25,0.5]                                                                                                                                             | 17934298    |
| M.MIC.10kx10k.10N [0.5,0.75]                                                                                                                                             | 7117834     |
| M.MIC.10kx10k.10N [0.75,1]                                                                                                                                               | 703279      |

## Supplemental bin plots

Figure S1 provides additional comparisons between Hoeffding's D statistic and other correlation methods. Along with Figure 3 C and D, Figure S1 A displays a noisy relationship with wide tails. This indicates a large range of Hoeffding scores corresponding to high correlations with the opposing metric. In contrast, Figure S1 B, like Figure 2 D, shows narrower tails indicating a more robust relationship between the two metrics.



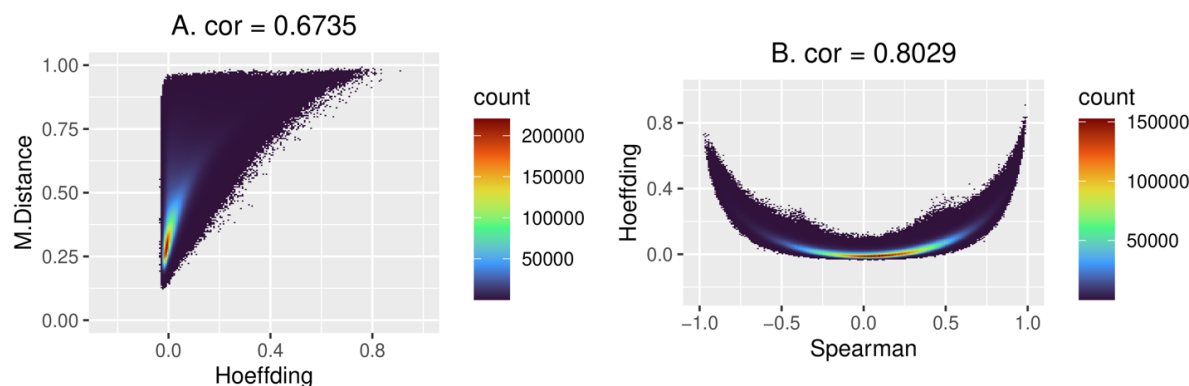

**Figure S1. Additional scatterplot comparisons with Hoeffding's D Statistic**

(A) *Hoeffding vs. M.Distance*, (B) *Spearman vs. Hoeffding*

Figure S2, together with Figure 2 F, shows all four comparisons of M.Pearson and B.Pearson plotted against Spearman and Kendall coefficients. The shape exhibited by the following graphs matches that of Figure 2 F. All four of these bin plots have a clear diagonal, with the slope of the diagonal being smaller when comparing to Kendall rather than Spearman. When comparing M.Pearson and B.Pearson to both Kendall and Spearman, strong Pearson correlations are assigned a wide range of scores by the opposing metric. In all four graphs, the size of the range of Kendall or Spearman values assigned to a fixed Pearson value remains relatively constant. In contrast, different values of Kendall or Spearman coefficients on the y-axis may obtain drastically different ranges of corresponding Pearson scores. Strong Kendall and Spearman scores correspond to a limited range of Pearson scores, while Kendall and Spearman scores near 0 are matched by Pearson scores ranging from strongly negative to strongly positive in all three bin plots in Figure S2, as well as in Figure 2 F.

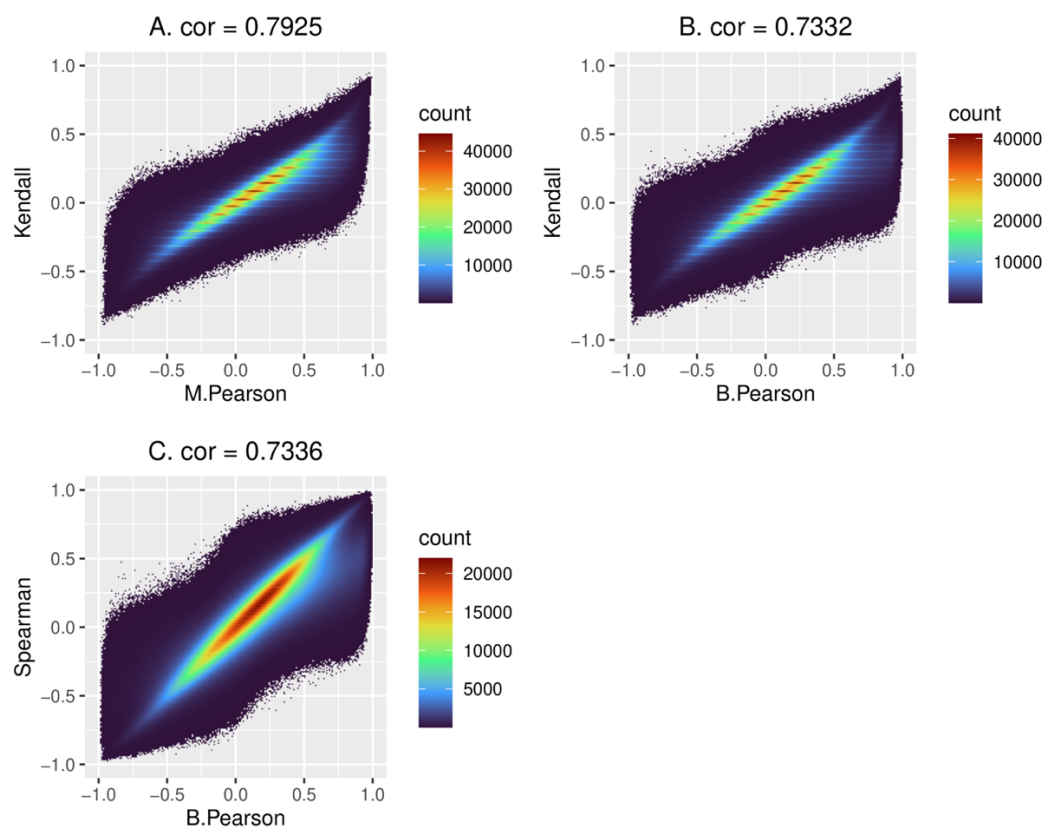

**Figure S2. Scatterplots comparing Pearson correlations to Kendall/Spearman correlations**

(A) *M.Pearson vs. Kendall*, (B) *B.Pearson vs. Kendall*, (C) *B.Pearson vs. Spearman*

Figure S3 provides additional comparisons between MIC and other correlation methods. As in Figure 3 B, Figure S3 A and B exhibit a loose chevron shape with significant noise, which indicated a large amount of disagreement between MIC and the opposing metrics as to whether the data were highly correlated or not. In Figure S3 C, the chevron is not apparent because Distance correlation only produces positive scores; however, the lower boundary of the plot is similar to that of Figure 3 B, with a large concentration of points having strong Distance coefficients and low MIC coefficients. Out of all the bin plot comparisons made with MIC, Figure S3 A and B most closely match the plot produced by Reshef et al. comparing Pearson and MIC.

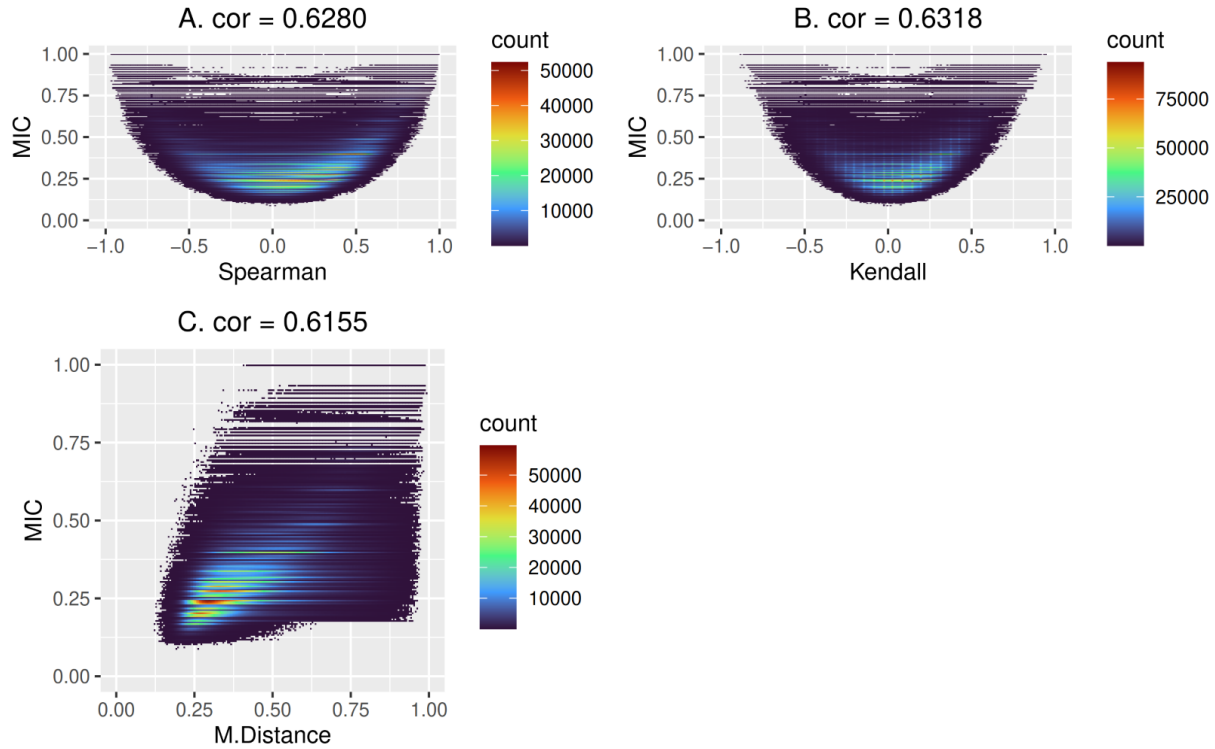

**Figure S3. Additional scatterplot comparisons with MIC**  
 (A) *M.Distance* vs. *MIC*, (B) *Kendall* vs. *MIC*, (C) *Spearman* vs. *MIC*
